# Supplementary material for: From Data to Optimal Decision Making: A Data-Driven, Probabilistic Machine Learning Approach to Decision Support for Patients With Sepsis
Source: PubMed Central journal article supplement (PMC4376114; doi:10.2196/medinform.3445), 2015-02-24
Supplement: medinform_v3i1e11_app1.pdf [file medinform_v3i1e11_app1.pdf]

# **From Data to Optimal Decision Making: A Data-driven, Probabilistic Machine Learning Approach to Decision Support for Patients with Sepsis**

Athanasios Tsoukalas<sup>1,2</sup>, Timothy Albertson<sup>3,4</sup>, Ilias Tagkopoulos<sup>1,2\*</sup>

<sup>1</sup>UC Davis Genome Center, University of California-Davis, Davis, CA, USA.

<sup>2</sup>Department of Computer Science, University of California-Davis, CA, USA.

<sup>3</sup>Department of Internal Medicine, University of California, Davis, CA, USA

<sup>4</sup>Northern California Veterans Administration Health Care System, Mather, CA, USA

\*Corresponding author

## **Supplementary Online Material**

**Supplementary Table 1.** Summary and p-values of 5-fold policy CV. Number of patient trajectory steps that lead to a better, same or worse state, with and without the optimal policy.

|                                                                                                            | with<br>policy | without<br>policy | p-value         |
|------------------------------------------------------------------------------------------------------------|----------------|-------------------|-----------------|
| Transitions to better state with policy drugs vs to better state without                                   |                |                   |                 |
| to better state                                                                                            | 1143           | 721               |                 |
| to other states                                                                                            | 1185           | 1189              | <b>1.28e-13</b> |
| Transitions to worse state with policy drugs vs to better state without                                    |                |                   |                 |
| to worse state                                                                                             | 605            | 518               |                 |
| to other states                                                                                            | 1723           | 1392              | <b>4.21e-1</b>  |
| Transitions to same state with policy drugs vs to same state without                                       |                |                   |                 |
| to same state                                                                                              | 580            | 671               |                 |
| to other states                                                                                            | 1748           | 1239              | <b>5.14e-13</b> |
| Trajectories (with >90% of transitions leading to a better state with/without policy drugs)                |                |                   |                 |
| to better                                                                                                  | 387            | 192               |                 |
| -same > 90%                                                                                                |                |                   |                 |
| to better                                                                                                  | 1098           | 1293              | <b>1.34e-19</b> |
| -same <90%                                                                                                 |                |                   |                 |
| Trajectories (with >90% of transitions leading to a better-same/worse state with policy drugs)             |                |                   |                 |
| 90% of transitions to better-same                                                                          | 387            | 1098              |                 |
| 90% of transitions to worse                                                                                | 503            | 982               | <b>4.01e-06</b> |
| Trajectories (with >90% of transitions leading to a better- <b>same</b> /worse state without policy drugs) |                |                   |                 |

|                                                                                                                                       |      |      |                  |
|---------------------------------------------------------------------------------------------------------------------------------------|------|------|------------------|
| 90% of transitions to better-same                                                                                                     | 1293 | 192  |                  |
| 90% of transitions to worse                                                                                                           | 721  | 764  | <b>4.63e-117</b> |
| Trajectories (with >90% of transitions leading to a better/same state with/without policy drugs vs all to better/same leading states) |      |      |                  |
| above 90% of transitions to better-same                                                                                               | 605  | 344  |                  |
| below 90% of transitions to better-same                                                                                               | 880  | 1141 | <b>8.65e-25</b>  |

**Supplementary Table 2.** 5-fold cross-validation results for evaluating the performance of the method, given the actual patient transitions with and without using the policy-proposed antibiotic combination. The table contains the number of transitions (4225 total transitions; 843 transitions per test fold) that lead to worse, equal or better states for each case. This table corresponds to Fig. 2A.

| FOLD State               | next state with policy antibiotics |     |     |    |    |      |    |    |    |    |       |    |    |    |    | next state without policy antibiotics |    |    |    |    |      |    |    |    |    |       |    |    |    |    |
|--------------------------|------------------------------------|-----|-----|----|----|------|----|----|----|----|-------|----|----|----|----|---------------------------------------|----|----|----|----|------|----|----|----|----|-------|----|----|----|----|
|                          | better                             |     |     |    |    | same |    |    |    |    | worse |    |    |    |    | better                                |    |    |    |    | same |    |    |    |    | worse |    |    |    |    |
|                          | 1                                  | 2   | 3   | 4  | 5  | 1    | 2  | 3  | 4  | 5  | 1     | 2  | 3  | 4  | 5  | 1                                     | 2  | 3  | 4  | 5  | 1    | 2  | 3  | 4  | 5  | 1     | 2  | 3  | 4  | 5  |
| No SIRS                  | 75                                 | 62  | 62  | 50 | 27 | 43   | 23 | 36 | 36 | 18 | 76    | 39 | 59 | 62 | 58 | 15                                    | 46 | 41 | 37 | 28 | 19   | 26 | 28 | 45 | 51 | 31    | 45 | 38 | 68 | 66 |
| SIRS                     | 7                                  | 20  | 41  | 36 | 14 | 1    | 1  | 7  | 3  | 3  | 0     | 10 | 8  | 10 | 8  | 42                                    | 17 | 9  | 12 | 13 | 6    | 1  | 1  | 1  | 0  | 12    | 4  | 2  | 5  | 5  |
| Probable SIRS            | 95                                 | 116 | 108 | 72 | 45 | 71   | 35 | 64 | 74 | 83 | 69    | 31 | 48 | 34 | 43 | 31                                    | 10 | 54 | 55 | 40 | 83   | 63 | 57 | 10 | 15 | 30    | 59 | 44 | 36 | 50 |
| Bacteremia               | 12                                 | 14  | 23  | 14 | 7  | 2    | 5  | 3  | 4  | 0  | 3     | 4  | 2  | 2  | 4  | 9                                     | 8  | 3  | 7  | 7  | 2    | 4  | 3  | 2  | 4  | 1     | 4  | 0  | 3  | 1  |
| Sepsis                   | 3                                  | 3   | 4   | 2  | 1  | 0    | 0  | 0  | 0  | 0  | 0     | 1  | 0  | 0  | 1  | 5                                     | 4  | 4  | 4  | 6  | 1    | 1  | 0  | 0  | 1  | 0     | 0  | 0  | 2  | 1  |
| Bacteremia Probable SIRS | 38                                 | 23  | 32  | 35 | 45 | 13   | 11 | 9  | 10 | 22 | 3     | 5  | 4  | 0  | 10 | 10                                    | 10 | 5  | 6  | 12 | 6    | 3  | 2  | 3  | 5  | 1     | 1  | 0  | 1  | 2  |
| Probable SIRS            | 12                                 | 14  | 14  | 5  | 5  | 0    | 1  | 0  | 0  | 0  | 2     | 3  | 2  | 1  | 2  | 17                                    | 14 | 8  | 15 | 15 | 0    | 1  | 0  | 1  | 0  | 3     | 1  | 0  | 1  | 0  |
| Septic Shock             | 2                                  | 1   | 2   | 0  | 2  | 0    | 0  | 0  | 0  | 1  | 1     | 0  | 0  | 0  | 0  | 0                                     | 3  | 1  | 3  | 1  | 0    | 0  | 0  | 0  | 0  | 0     | 0  | 0  | 0  | 1  |

**Supplementary Table 3.** A state-specific percentage across all folds of the 5-fold cross-validation results for comparison of the different policy strategies. This table corresponds to Fig. 2A.

| State               | Percent of patients with next state |            |            |                            |            |            |
|---------------------|-------------------------------------|------------|------------|----------------------------|------------|------------|
|                     | With policy antibiotics             |            |            | Without policy antibiotics |            |            |
|                     | better                              | same       | worse      | better                     | same       | worse      |
| No SIRS             | 38%                                 | 22%        | 40%        | 28%                        | 29%        | 43%        |
|                     | (276/727)                           | (157/727)  | (294/727)  | (167/584)                  | (169/584)  | (248/584)  |
| SIRS                | 70%                                 | 10%        | 20%        | 71%                        | 6%         | 23%        |
|                     | (118/169)                           | (15/169)   | (36/169)   | (93/130)                   | (9/130)    | (28/130)   |
| Probable SIRS       | 44%                                 | 33%        | 23%        | 29%                        | 47%        | 24%        |
|                     | (436/988)                           | (327/988)  | (225/988)  | (284/957)                  | (454/957)  | (219/957)  |
| Bacteremia          | 71%                                 | 14%        | 15%        | 58%                        | 25%        | 17%        |
|                     | (70/99)                             | (14/99)    | (15/99)    | (34/58)                    | (15/58)    | (9/58)     |
| Sepsis              | 87%                                 | 0%         | 13%        | 78%                        | 11%        | 11%        |
|                     | (13/15)                             | (0/15)     | (2/15)     | (23/29)                    | (3/29)     | (3/29)     |
| Bacteremia Probable | 67%                                 | 25%        | 8%         | 64%                        | 28%        | 8%         |
|                     | (173/260)                           | (65/260)   | (22/260)   | (43/67)                    | (19/67)    | (5/67)     |
| SIRS Probable       | 82%                                 | 1%         | 17%        | 90%                        | 3%         | 7%         |
|                     | (50/61)                             | (1/61)     | (10/61)    | (69/76)                    | (2/76)     | (5/76)     |
| Septic Shock        | 78%                                 | 11%        | 11%        | 88%                        | 0%         | 12%        |
|                     | (7/9)                               | (1/9)      | (1/9)      | (8/9)                      | (0/9)      | (1/9)      |
| <b>TOTAL</b>        | 49%                                 | 25%        | 26%        | 37%                        | 35%        | 28%        |
|                     | (1143/2328)                         | (580/2328) | (605/2328) | (721/1910)                 | (671/1910) | (518/1910) |



**Supplementary Table 5.** Summary of the reduced training set results. This table corresponds to Fig.

| Training set | With policy antibiotics |                         |                         | Without policy antibiotics |                         |                         |
|--------------|-------------------------|-------------------------|-------------------------|----------------------------|-------------------------|-------------------------|
|              | better                  | same                    | worse                   | better                     | same                    | worse                   |
| Full         | 52%<br><b>(482/929)</b> | 21%<br><b>(195/929)</b> | 27%<br><b>(252/929)</b> | 41%<br><b>(195/470)</b>    | 34%<br><b>(162/470)</b> | 25%<br><b>(113/470)</b> |
| 90%          | 54%<br><b>(528/981)</b> | 21%<br><b>(202/981)</b> | 25%<br><b>(251/981)</b> | 36%<br><b>(149/418)</b>    | 37%<br><b>(155/418)</b> | 27%<br><b>(114/418)</b> |
| 85%          | 54%<br><b>(523/969)</b> | 21%<br><b>(198/969)</b> | 25%<br><b>(248/969)</b> | 36%<br><b>(154/430)</b>    | 37%<br><b>(159/430)</b> | 27%<br><b>(117/430)</b> |
| 80%          | 51%<br><b>(432/842)</b> | 22%<br><b>(177/842)</b> | 27%<br><b>(233/842)</b> | 43%<br><b>(245/557)</b>    | 33%<br><b>(180/557)</b> | 24%<br><b>(132/557)</b> |
| 75%          | 51%<br><b>(432/842)</b> | 22%<br><b>(177/842)</b> | 27%<br><b>(233/842)</b> | 43%<br><b>(245/557)</b>    | 33%<br><b>(180/557)</b> | 24%<br><b>(132/557)</b> |
| 50%          | 49%<br><b>(477/971)</b> | 26%<br><b>(255/971)</b> | 25%<br><b>(239/971)</b> | 46%<br><b>(200/428)</b>    | 26%<br><b>(110/428)</b> | 28%<br><b>(118/428)</b> |

2C.

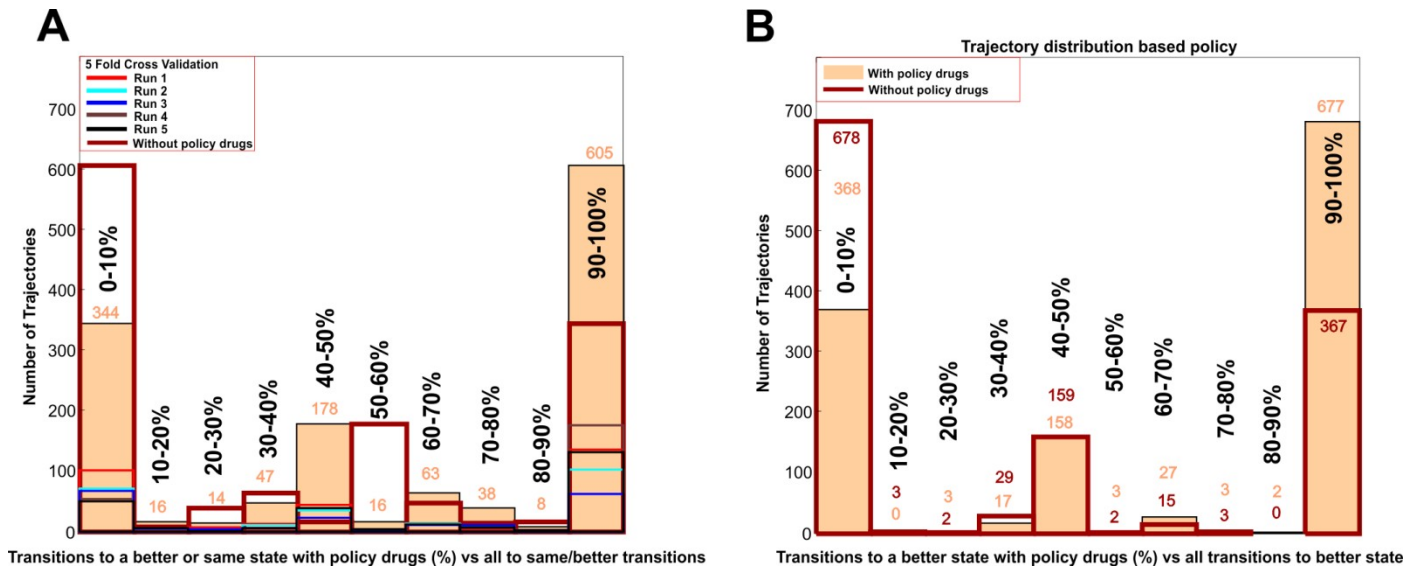

**Supplementary Figure 1. Performance and Robustness of the POMDP Clinical Decision Support System for Sepsis. (A)** Number of patient trajectories vs. the percentage of their transitions that lead to a better or same state vs all same/better state transitions. Each line represents a different fold across the 5-fold cross-validation. **(B)** Number of patient trajectories vs. the percentage of their transitions that lead to a better state vs all to better state transitions.



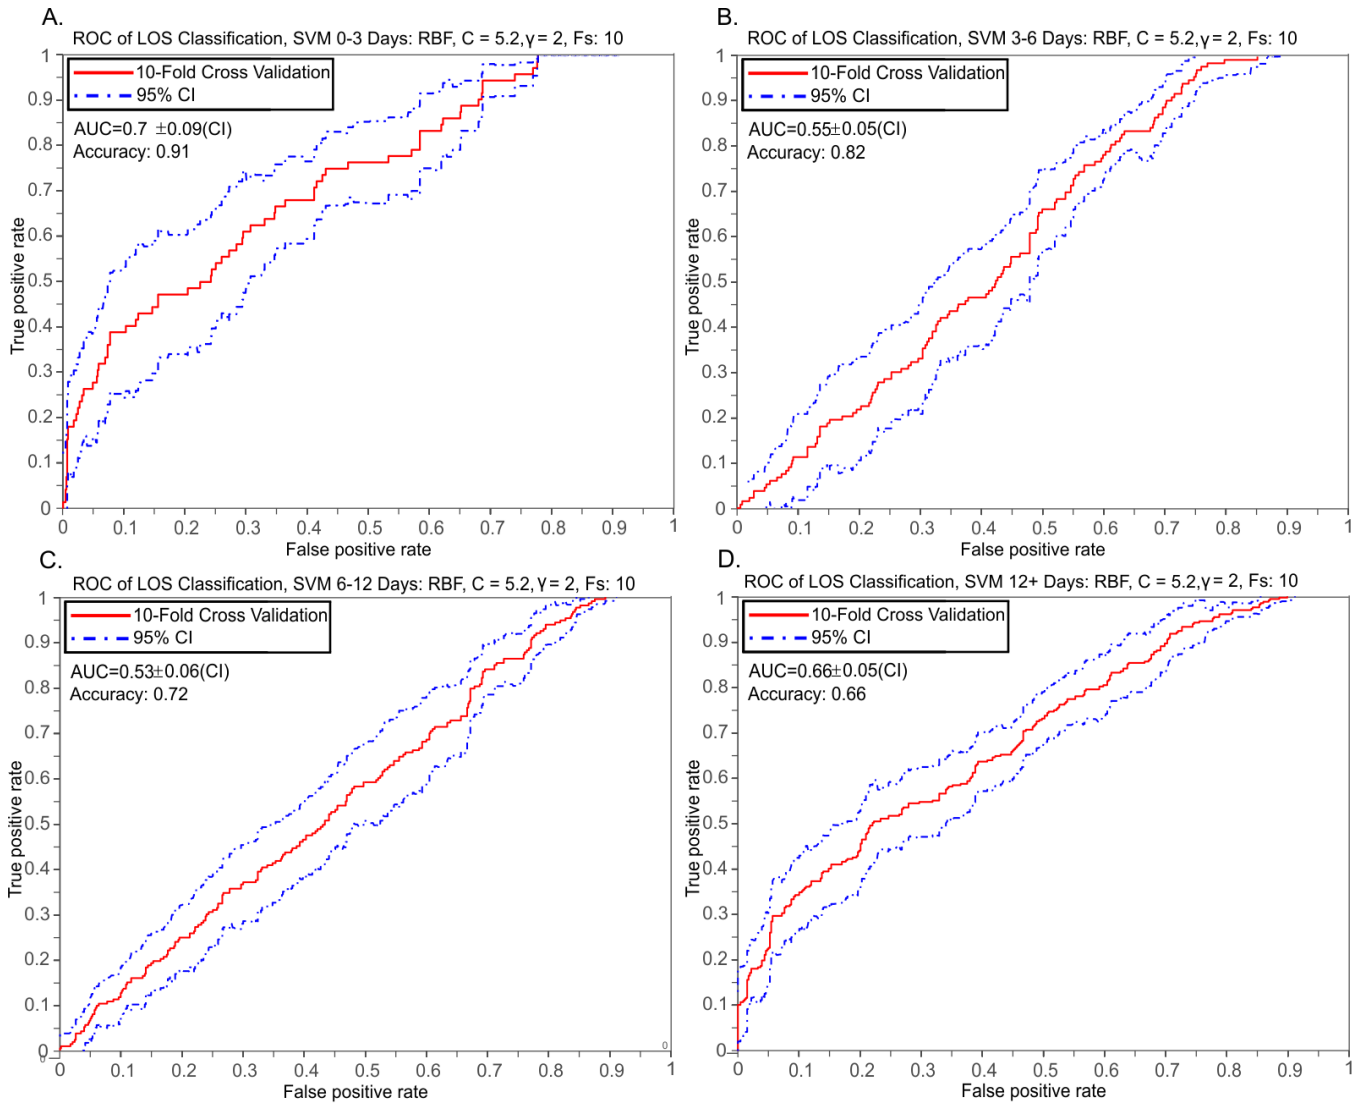

**Supplementary Figure 2. Predicting a patient’s Length of Stay (LOS) – Multiclass SVM.**

ROC curves for a multiclass classifier where 0-3, 3-6, 6-12 and 12+ days groups were used as classes. The one vs all method is used for the training and test group classification in each of the cross validation iterations.

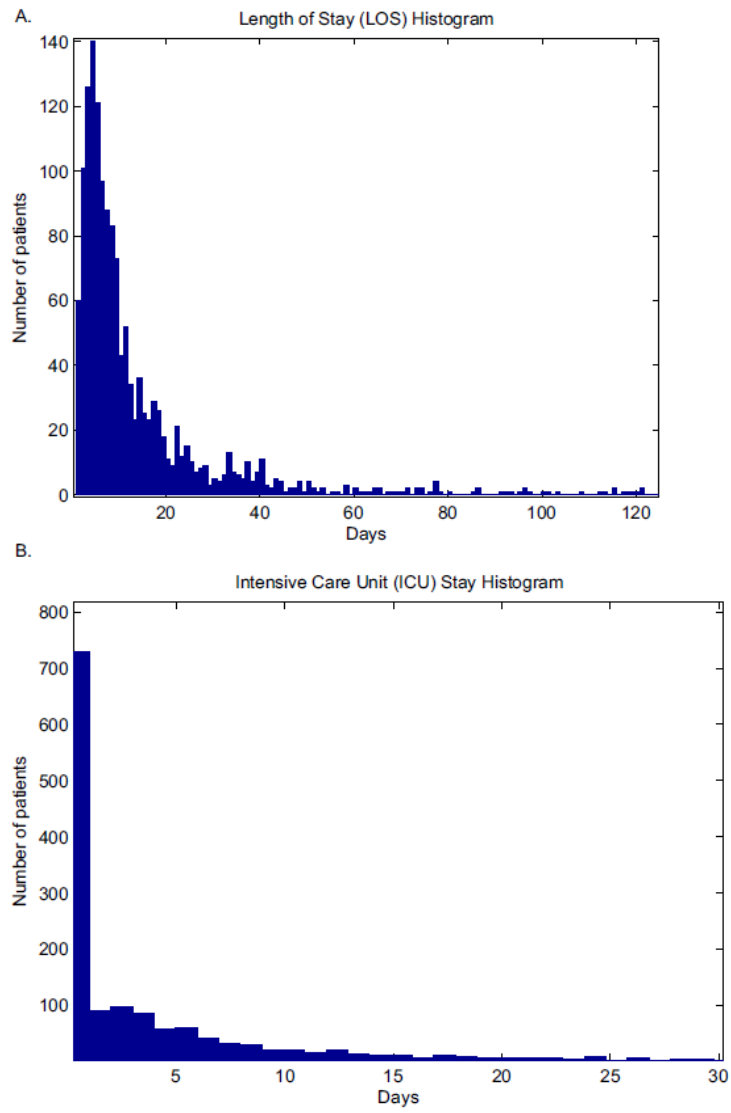

Supplementary Figure 3. Total and ICU length of stay histogram.
